# Supplementary material for: Subjective well-being in non-obese individuals depends strongly on body composition
Source: PubMed Central journal article supplement (PMC8576020; doi:10.1038/s41598-021-01205-6), 2021-11-08
Supplement: 41598_2021_1205_MOESM1_ESM.pdf [file 41598_2021_1205_MOESM1_ESM.pdf]

## **Subjective well-being in non-obese individuals depends strongly on body composition**

Małgorzata Chlabcz<sup>1,2</sup>, Marlena Dubatówka<sup>1</sup>, Jacek Jamiołkowski<sup>1</sup>, Paweł Sowa<sup>1</sup>, Magda Łapińska<sup>1</sup>, Andrzej Raczkowski<sup>1</sup>, Wojciech Łaguna<sup>3</sup>, Anna M. Moniuszko-Malinowska<sup>4</sup>, Napoleon Waszkiewicz<sup>5</sup>, Irina Kowalska<sup>6</sup> and Karol A. Kamiński<sup>1,7\*</sup>

<sup>1</sup>Department of Population Medicine and Lifestyle Diseases Prevention, Medical University of Białystok, Białystok, Poland

<sup>2</sup>Department of Invasive Cardiology, Medical University of Białystok, Białystok, Poland

<sup>3</sup>Faculty of Computer Science, Białystok University of Technology, Białystok, Poland

<sup>4</sup>Department of Infectious Diseases and Neuroinfection, Medical University of Białystok, Białystok, Poland

<sup>5</sup>Department of Psychiatry, Medical University of Białystok, Białystok, Poland

<sup>6</sup>Department of Internal Medicine and Metabolic Diseases, Medical University of Białystok, Białystok, Poland

<sup>7</sup>Department of Cardiology, Medical University of Białystok, Białystok, Poland

\*Corresponding author:

Karol Adam Kamiński, MD, PhD

Department of Population Medicine and Lifestyle Diseases Prevention, Medical University of Białystok

ul. Waszyngtona 13A, 15-269 Białystok, Poland

Tel.: +48-856-865-371

fizklin@wp.pl

Table S1. Univariate linear regression analysis between body composition and subjective well-being scores in non-obese women.

| Variable                               | SWLS    |          | EQ-VAS  |          | BDI                  |          |
|----------------------------------------|---------|----------|---------|----------|----------------------|----------|
|                                        | B       | <i>p</i> | B       | <i>p</i> | B                    | <i>p</i> |
| Age, years                             | -0.079  | <0.001   | -0.327  | <0.001   | 0.086                | <0.001   |
| Height, cm                             | 0.091   | 0.040    | 0.455   | <0.001   | -0.152               | 0.004    |
| Weight, kg                             | -0.010  | 0.770    | -0.190  | 0.023    | -0.014               | 0.725    |
| BMI, kg/m <sup>2</sup>                 | -0.143  | 0.109    | -1.102  | <0.001   | 0.145                | 0.178    |
| WHR                                    | -18.226 | <0.001   | -54.015 | <0.001   | 16.017               | 0.001    |
| Waist, cm                              | -0.110  | 0.001    | -0.514  | <0.001   | 0.088                | 0.030    |
| Hip, cm                                | 0.009   | 0.801    | -0.233  | <0.001   | -0.023               | 0.626    |
| Thigh, cm                              | 0.088   | 0.129    | 0.004   | 0.981    | -0.097               | 0.164    |
| Fat Mass Index, kg/m <sup>2</sup>      | -0.220  | 0.069    | -1.660  | <0.001   | 0.204                | 0.161    |
| Lean Mass Index, kg/m <sup>2</sup>     | -0.098  | 0.668    | -1.403  | 0.017    | 0.224                | 0.417    |
| Visceral mass index, kg/m <sup>2</sup> | -6.139  | <0.001   | -31.455 | <0.001   | 6.235                | 0.001    |
| Android fat mass, kg                   | -0.001  | 0.044    | -0.005  | <0.001   | 0.001                | 0.097    |
| Gynoid fat mass, kg                    | 8.553   | 0.770    | -0.001  | 0.054    | 0.000                | 0.572    |
| Gynoid lean mass, kg                   | 0.001   | 0.021    | 0.002   | 0.072    | -0.001               | 0.021    |
| Legs fat mass, kg                      | 0.000   | 0.265    | 0.000   | 0.408    | 0.000                | 0.183    |
| Legs lean mass, kg                     | 0.000   | 0.095    | 0.001   | 0.070    | 0.000<br>β<br>-0.113 | 0.028    |
| AF/GF                                  | -6.196  | 0.002    | -28.203 | <0.001   | 5.867                | 0.012    |
| GF/TF                                  | -7.221  | 0.074    | -5.097  | 0.619    | 5.428                | 0.278    |
| AF/TF                                  | -20.562 | 0.005    | -65.676 | <0.001   | 19.841               | 0.024    |
| LF/TF                                  | -2.805  | 0.163    | 0.239   | 0.963    | 1.839                | 0.464    |
| GL/TL                                  | 4.373   | 0.637    | 8.927   | 0.710    | -22.374              | 0.045    |
| LL/TL                                  | 1.024   | 0.787    | 5.687   | 0.564    | -9.202               | 0.044    |

AF/GF, android fat/gynoid fat; GF/TF, gynoid fat/total fat; AF/TF, android fat/total fat; LF/TF legs fat/total fat; GL/TL gynoid lean/total lean; LL/TL legs lean/total lean

Table S2. Univariate linear regression analysis between body composition and subjective well-being scores in non-obese men.

| Variable                               | SWLS   |          | EQ-VAS  |          | BDI     |          |
|----------------------------------------|--------|----------|---------|----------|---------|----------|
|                                        | B      | <i>p</i> | B       | <i>p</i> | B       | <i>p</i> |
| Age, years                             | 0.008  | 0.677    | -0.275  | <0.001   | 0.021   | 0.387    |
| Height, cm                             | 0.001  | 0.988    | 0.297   | 0.007    | -0.090  | 0.082    |
| Weight, kg                             | 0.023  | 0.420    | 0.087   | 0.246    | -0.040  | 0.235    |
| BMI, kg/m <sup>2</sup>                 | 0.097  | 0.389    | -0.196  | 0.507    | -0.021  | 0.879    |
| WHR                                    | -8.377 | 0.069    | -45.278 | <0.001   | 3.488   | 0.532    |
| Waist, cm                              | -0.013 | 0.718    | -0.303  | <0.001   | 0.003   | 0.941    |
| Hip, cm                                | 0.067  | 0.168    | -0.098  | 0.441    | -0.032  | 0.579    |
| Thigh, cm                              | 0.115  | 0.089    | 0.596   | 0.001    | -0.181  | 0.026    |
| Fat Mass Index, kg/m <sup>2</sup>      | 0.092  | 0.521    | -1.114  | 0.003    | 0.125   | 0.470    |
| Lean Mass Index, kg/m <sup>2</sup>     | 0.167  | 0.439    | 1.711   | 0.002    | -0.366  | 0.160    |
| Visceral mass index, kg/m <sup>2</sup> | 0.016  | 0.989    | -13.570 | <0.001   | 0.750   | 0.593    |
| Android fat mass, kg                   | 0.000  | 0.599    | -0.002  | 0.003    | 8.499   | 0.823    |
| Gynoid fat mass, kg                    | 0.000  | 0.291    | -0.001  | 0.481    | 3.748   | 0.925    |
| Gynoid lean mass, kg                   | 0.000  | 0.348    | 0.003   | <0.001   | -0.001  | 0.007    |
| Legs fat mass, kg                      | 0.000  | 0.323    | 0.000   | 0.365    | 6.120   | 0.779    |
| Legs lean mass, kg                     | 4.344  | 0.699    | 0.001   | <0.001   | 0.000   | 0.073    |
| AF/GF                                  | 0.418  | 0.776    | -11.995 | 0.001    | -0.261  | 0.883    |
| GF/TF                                  | 1.146  | 0.777    | -16.183 | 0.123    | -0.656  | 0.892    |
| AF/TF                                  | 1.414  | 0.757    | -34.338 | 0.004    | -1.144  | 0.834    |
| LF/TF                                  | 0.584  | 0.792    | -10.235 | 0.074    | 0.092   | 0.972    |
| GL/TL                                  | 0.816  | 0.903    | 50.396  | 0.003    | -18.386 | 0.021    |
| LL/TL                                  | -0.402 | 0.886    | 18.514  | 0.010    | -6.312  | 0.061    |

AF/GF, android fat/gynoid fat; GF/TF, gynoid fat/total fat; AF/TF, android fat/total fat; LF/TF legs fat/total fat; GL/TL gynoid lean/total lean; AL/TL android lean/total lean; LL/TL legs lean/total lean

Table S3. Multivariable linear regression analysis adjusted by age (Model 1) between body composition and subjective well-being scores in non-obese women.

| Variable                               | SWLS    |          | EQ-VAS  |          | BDI     |          |
|----------------------------------------|---------|----------|---------|----------|---------|----------|
|                                        | B       | <i>p</i> | B       | <i>p</i> | B       | <i>p</i> |
| Height, cm                             | 0.008   | 0.873    | 0.131   | 0.287    | -0.073  | 0.219    |
| Weight, kg                             | 0.009   | 0.775    | -0.106  | 0.187    | -0.034  | 0.373    |
| BMI, kg/m <sup>2</sup>                 | 0.012   | 0.899    | -0.540  | 0.025    | -0.030  | 0.799    |
| WHR                                    | -13.594 | 0.002    | -31.031 | 0.005    | 10.400  | 0.046    |
| Waist, cm                              | -0.057  | 0.129    | -0.303  | 0.001    | 0.021   | 0.643    |
| Hip, cm                                | 0.046   | 0.213    | -0.093  | 0.323    | -0.063  | 0.158    |
| Thigh, cm                              | 0.076   | 0.178    | -0.028  | 0.844    | -0.083  | 0.226    |
| Fat Mass Index, kg/m <sup>2</sup>      | -0.010  | 0.939    | -0.901  | 0.007    | -0.041  | 0.798    |
| Lean Mass Index, kg/m <sup>2</sup>     | 0.146   | 0.526    | -0.351  | 0.546    | -0.052  | 0.853    |
| Visceral mass index, kg/m <sup>2</sup> | -3.180  | 0.105    | -22.548 | <0.001   | 3.013   | 0.194    |
| Android fat mass, kg                   | 0.000   | 0.608    | -0.003  | 0.003    | 0.000   | 0.801    |
| Gynoid fat mass, kg                    | 0.000   | 0.530    | -0.001  | 0.141    | 0.000   | 0.400    |
| Gynoid lean mass, kg                   | 0.001   | 0.143    | 0.001   | 0.618    | -0.001  | 0.129    |
| Legs fat mass, kg                      | 0.000   | 0.181    | 0.000   | 0.654    | 0.000   | 0.130    |
| Legs lean mass, kg                     | 0.000   | 0.395    | 0.000   | 0.545    | 0.000   | 0.143    |
| AF/GF                                  | -3.145  | 0.147    | -15.929 | 0.003    | 2.237   | 0.387    |
| GF/TF                                  | -7.482  | 0.058    | -7.399  | 0.444    | 6.059   | 0.218    |
| AF/TF                                  | -13.468 | 0.068    | -35.560 | 0.052    | 11.678  | 0.194    |
| LF/TF                                  | -3.054  | 0.121    | -1.197  | 0.805    | 2.290   | 0.353    |
| GL/TL                                  | 5.655   | 0.533    | 12.487  | 0.581    | -23.279 | 0.034    |
| LL/TL                                  | 1.383   | 0.710    | 6.600   | 0.478    | -9.438  | 0.035    |

AF/GF, android fat/gynoid fat; GF/TF, gynoid fat/total fat; AF/TF, android fat/total fat; LF/TF legs fat/total fat; GL/TL gynoid lean/total lean; AL/TL android lean/total lean; LL/TL legs lean/total lean

Model 1: adjusted for age.

Table S4. Multivariable linear regression analysis adjusted by age (Model 1) between body composition and subjective well-being scores in non-obese men.

| Variable                               | SWLS    |          | EQ-5D   |          | BDI     |          |
|----------------------------------------|---------|----------|---------|----------|---------|----------|
|                                        | B       | <i>p</i> | B       | <i>p</i> | B       | <i>p</i> |
| Height, cm                             | 0.009   | 0.842    | 0.069   | 0.552    | -0.086  | 0.129    |
| Weight, kg                             | 0.024   | 0.402    | 0.058   | 0.419    | -0.039  | 0.256    |
| BMI, kg/m <sup>2</sup>                 | 0.091   | 0.429    | 0.152   | 0.597    | -0.050  | 0.722    |
| WHR                                    | -11.382 | 0.026    | -22.119 | 0.079    | 1.846   | 0.768    |
| Waist, cm                              | -0.022  | 0.559    | -0.131  | 0.167    | -0.013  | 0.781    |
| Hip, cm                                | 0.066   | 0.182    | -0.017  | 0.891    | -0.039  | 0.514    |
| Thigh, cm                              | 0.141   | 0.050    | 0.318   | 0.074    | -0.179  | 0.038    |
| Fat Mass Index, kg/m <sup>2</sup>      | 0.082   | 0.587    | -0.551  | 0.144    | 0.089   | 0.624    |
| Lean Mass Index, kg/m <sup>2</sup>     | 0.170   | 0.431    | 1.577   | 0.003    | -0.363  | 0.163    |
| Visceral mass index, kg/m <sup>2</sup> | -0.347  | 0.803    | -6.717  | 0.053    | 0.123   | 0.941    |
| Android fat mass, kg                   | 0.000   | 0.677    | -0.001  | 0.169    | -1.914  | 0.962    |
| Gynoid fat mass, kg                    | 0.000   | 0.287    | -0.001  | 0.410    | 4.275   | 0.915    |
| Gynoid lean mass, kg                   | 0.000   | 0.247    | 0.002   | 0.007    | -0.001  | 0.010    |
| Legs fat mass, kg                      | 0.000   | 0.308    | -0.001  | 0.198    | 7.311   | 0.739    |
| Legs lean mass, kg                     | 6.847   | 0.569    | 0.001   | 0.071    | 0.000   | 0.110    |
| AF/GF                                  | 0.136   | 0.936    | -2.186  | 0.605    | -1.450  | 0.485    |
| GF/TF                                  | 1.311   | 0.748    | -22.241 | 0.027    | -0.219  | 0.964    |
| AF/TF                                  | 1.208   | 0.793    | -26.101 | 0.023    | -1.840  | 0.738    |
| LF/TF                                  | 0.698   | 0.755    | -14.404 | 0.009    | 0.401   | 0.881    |
| GL/TL                                  | 1.076   | 0.872    | 39.080  | 0.016    | -17.859 | 0.026    |
| LL/TL                                  | -0.291  | 0.918    | 13.539  | 0.050    | -6.063  | 0.073    |

AF/GF, android fat/gynoid fat; GF/TF, gynoid fat/total fat; AF/TF, android fat/total fat; LF/TF legs fat/total fat; GL/TL gynoid lean/total lean; AL/TL android lean/total lean; LL/TL legs lean/total lean

Model 1: adjusted for age.

Table S5. Multivariable linear regression analysis adjusted by age, history of CVD (i.e. arterial hypertension (AH), atrial fibrillation (AF), MI, coronary heart disease (CHD), peripheral artery disease (PAD), stroke), history of diabetes mellitus (Model 2) between body composition and subjective well-being scores in non-obese women.

| Variable                               | SWLS    |          | EQ-VAS  |          | BDI     |          |
|----------------------------------------|---------|----------|---------|----------|---------|----------|
|                                        | B       | <i>p</i> | B       | <i>p</i> | B       | <i>p</i> |
| Height, cm                             | 0.012   | 0.810    | 0.115   | 0.348    | -0.074  | 0.217    |
| Weight, kg                             | 0.013   | 0.691    | -0.079  | 0.322    | -0.043  | 0.267    |
| BMI, kg/m <sup>2</sup>                 | 0.020   | 0.841    | -0.434  | 0.071    | -0.059  | 0.619    |
| WHR                                    | -14.458 | 0.001    | -25.719 | 0.018    | 10.203  | 0.054    |
| Waist, cm                              | -0.060  | 0.119    | -0.257  | 0.006    | 0.018   | 0.692    |
| Hip, cm                                | 0.051   | 0.181    | -0.082  | 0.376    | -0.065  | 0.149    |
| Thigh, cm                              | 0.086   | 0.137    | -0.027  | 0.848    | -0.104  | 0.133    |
| Fat Mass Index, kg/m <sup>2</sup>      | -0.007  | 0.957    | -0.756  | 0.023    | -0.068  | 0.674    |
| Lean Mass Index, kg/m <sup>2</sup>     | 0.184   | 0.433    | -0.236  | 0.681    | -0.142  | 0.618    |
| Visceral mass index, kg/m <sup>2</sup> | -3.706  | 0.078    | -19.218 | <0.001   | 3.492   | 0.156    |
| Android fat mass, kg                   | 0.000   | 0.608    | -0.002  | 0.014    | 9.709   | 0.844    |
| Gynoid fat mass, kg                    | 0.000   | 0.474    | -0.001  | 0.168    | 0.000   | 0.269    |
| Gynoid lean mass, kg                   | 0.001   | 0.094    | 0.001   | 0.560    | -0.001  | 0.077    |
| Legs fat mass, kg                      | 0.000   | 0.308    | -0.001  | 0.198    | 7.311   | 0.739    |
| Legs lean mass, kg                     | 6.847   | 0.569    | 0.001   | 0.071    | 0.000   | 0.110    |
| AF/GF                                  | -3.729  | 0.106    | -13.004 | 0.019    | 3.202   | 0.239    |
| GF/TF                                  | -7.160  | 0.075    | -3.709  | 0.698    | 4.471   | 0.368    |
| AF/TF                                  | -13.046 | 0.084    | -22.513 | 0.217    | 10.832  | 0.235    |
| LF/TF                                  | -2.881  | 0.151    | 0.317   | 0.947    | 1.556   | 0.533    |
| GL/TL                                  | 7.042   | 0.447    | 21.530  | 0.337    | -26.193 | 0.018    |
| LL/TL                                  | 1.992   | 0.599    | 10.283  | 0.263    | -10.571 | 0.019    |

AF/GF, android fat/gynoid fat; GF/TF, gynoid fat/total fat; AF/TF, android fat/total fat; LF/TF legs fat/total fat; GL/TL gynoid lean/total lean; AL/TL android lean/total lean; LL/TL legs lean/total lean

Model 2: adjusted for age, history of cardiovascular diseases (i.e. arterial hypertension, atrial fibrillation, myocardial infarction, coronary heart disease, peripheral artery disease, stroke) and history of diabetes mellitus.

Table S6. Multivariable linear regression analysis adjusted by age, history of CVD (i.e. arterial hypertension (AH), atrial fibrillation (AF), MI, coronary heart disease (CHD), peripheral artery disease (PAD), stroke), history of diabetes mellitus (Model 2) between body composition and subjective well-being scores in non-obese men.

| Variable                               | SWLS    |          | EQ-VAS  |          | BDI     |          |
|----------------------------------------|---------|----------|---------|----------|---------|----------|
|                                        | B       | <i>p</i> | B       | <i>p</i> | B       | <i>p</i> |
| Height, cm                             | -0.007  | 0.891    | 0.005   | 0.966    | -0.081  | 0.164    |
| Weight, kg                             | 0.018   | 0.531    | 0.061   | 0.399    | -0.0437 | 0.221    |
| BMI, kg/m <sup>2</sup>                 | 0.089   | 0.460    | 0.278   | 0.347    | -0.081  | 0.581    |
| WHR                                    | -11.195 | 0.039    | -11.232 | 0.391    | 0.756   | 0.911    |
| Waist, cm                              | -0.020  | 0.614    | -0.067  | 0.498    | -0.022  | 0.654    |
| Hip, cm                                | 0.067   | 0.197    | -0.002  | 0.984    | -0.044  | 0.481    |
| Thigh, cm                              | 0.143   | 0.055    | 0.359   | 0.046    | -0.178  | 0.047    |
| Fat Mass Index, kg/m <sup>2</sup>      | 0.067   | 0.671    | -0.361  | 0.350    | 0.071   | 0.708    |
| Lean Mass Index, kg/m <sup>2</sup>     | 0.189   | 0.395    | 1.564   | 0.003    | -0.413  | 0.128    |
| Visceral mass index, kg/m <sup>2</sup> | -0.455  | 0.758    | -4.885  | 0.177    | -0.151  | 0.933    |
| Android fat mass, kg                   | 0.000   | 0.738    | -0.001  | 0.433    | -6.105  | 0.885    |
| Gynoid fat mass, kg                    | 0.000   | 0.413    | -0.001  | 0.501    | 2.307   | 0.956    |
| Gynoid lean mass, kg                   | 0.000   | 0.325    | 0.002   | 0.010    | -0.001  | 0.011    |
| Legs fat mass, kg                      | 0.000   | 0.462    | -0.001  | 0.191    | 7.489   | 0.743    |
| Legs lean mass, kg                     | 4.781   | 0.700    | 0.000   | 0.104    | 0.000   | 0.115    |
| AF/GF                                  | 0.343   | 0.848    | 1.673   | 0.697    | -1.728  | 0.430    |
| GF/TF                                  | 1.195   | 0.777    | -19.438 | 0.055    | -0.772  | 0.880    |
| AF/TF                                  | 1.810   | 0.708    | -19.796 | 0.093    | -2.836  | 0.627    |
| LF/TF                                  | 0.557   | 0.809    | -13.508 | 0.015    | 0.222   | 0.937    |
| GL/TL                                  | 0.123   | 0.986    | 36.455  | 0.025    | -19.834 | 0.017    |
| LL/TL                                  | -0.708  | 0.808    | 12.470  | 0.071    | -6.789  | 0.053    |

AF/GF, android fat/gynoid fat; GF/TF, gynoid fat/total fat; AF/TF, android fat/total fat; LF/TF legs fat/total fat; GL/TL gynoid lean/total lean; AL/TL android lean/total lean; LL/TL legs lean/total lean

Model 2: adjusted for age, history of cardiovascular diseases (i.e. arterial hypertension, atrial fibrillation, myocardial infarction, coronary heart disease, peripheral artery disease, stroke) and history of diabetes mellitus.

Table S7. Multivariable linear regression analysis adjusted by age and WHR (Model 3)

between body composition and subjective well-being scores in non-obese women.

| Variable                               | SWLS   |          | EQ-VAS  |          | BDI     |          |
|----------------------------------------|--------|----------|---------|----------|---------|----------|
|                                        | B      | <i>p</i> | B       | <i>p</i> | B       | <i>p</i> |
| Height, cm                             | -0.007 | 0.893    | 0.099   | 0.418    | -0.062  | 0.297    |
| Weight, kg                             | 0.025  | 0.436    | -0.068  | 0.398    | -0.049  | 0.209    |
| BMI, kg/m <sup>2</sup>                 | 0.085  | 0.385    | -0.388  | 0.116    | -0.093  | 0.433    |
| Waist, cm                              | 0.023  | 0.629    | -0.224  | 0.058    | -0.054  | 0.340    |
| Hip, cm                                | 0.021  | 0.578    | -0.164  | 0.086    | -0.045  | 0.324    |
| Thigh, cm                              | 0.065  | 0.247    | -0.060  | 0.670    | -0.074  | 0.279    |
| Fat Mass Index, kg/m <sup>2</sup>      | 0.069  | 0.604    | -0.745  | 0.027    | -0.109  | 0.497    |
| Lean Mass Index, kg/m <sup>2</sup>     | 0.319  | 0.175    | 0.086   | 0.884    | -0.205  | 0.476    |
| Visceral mass index, kg/m <sup>2</sup> | -0.983 | 0.640    | -20.103 | <0.001   | 1.433   | 0.569    |
| Android fat mass, kg                   | 0.000  | 0.694    | -0.002  | 0.026    | 0.000   | 0.692    |
| Gynoid fat mass, kg                    | 0.000  | 0.642    | -0.001  | 0.088    | 0.000   | 0.465    |
| Gynoid lean mass, kg                   | 0.001  | 0.145    | 0.001   | 0.539    | -0.001  | 0.117    |
| Legs fat mass, kg                      | 0.000  | 0.311    | 0.000   | 0.382    | 0.000   | 0.200    |
| Legs lean mass, kg                     | 0.000  | 0.270    | 0.000   | 0.369    | 0.000   | 0.095    |
| AF/GF                                  | -0.119 | 0.961    | -10.735 | 0.075    | -0.361  | 0.901    |
| GF/TF                                  | -8.057 | 0.039    | -9.114  | 0.343    | 6.610   | 0.178    |
| AF/TF                                  | -8.849 | 0.238    | -25.721 | 0.167    | 7.942   | 0.388    |
| LF/TF                                  | -3.582 | 0.067    | -2.631  | 0.585    | 2.787   | 0.259    |
| GL/TL                                  | 8.821  | 0.332    | 22.665  | 0.318    | -26.692 | 0.016    |
| LL/TL                                  | 3.128  | 0.402    | 11.583  | 0.215    | -11.201 | 0.013    |

AF/GF, android fat/gynoid fat; GF/TF, gynoid fat/total fat; AF/TF, android fat/total fat; LF/TF legs fat/total fat; GL/TL gynoid lean/total lean; AL/TL android lean/total lean; LL/TL legs lean/total lean  
 Model 3: adjusted for age and WHR.



Table S8. Multivariable linear regression analysis adjusted by age and WHR (Model 3)

between body composition and subjective well-being scores in non-obese men.

| Variable                               | SWLS  |          | EQ-VAS  |          | BDI     |          |
|----------------------------------------|-------|----------|---------|----------|---------|----------|
|                                        | B     | <i>p</i> | B       | <i>p</i> | B       | <i>p</i> |
| Height, cm                             | 0.011 | 0.814    | 0.068   | 0.554    | -0.086  | 0.133    |
| Weight, kg                             | 0.059 | 0.054    | 0.123   | 0.111    | -0.050  | 0.181    |
| BMI, kg/m <sup>2</sup>                 | 0.301 | 0.023    | 0.521   | 0.113    | -0.090  | 0.578    |
| Waist, cm                              | 0.071 | 0.176    | -0.031  | 0.814    | -0.042  | 0.512    |
| Hip, cm                                | 0.065 | 0.186    | -0.023  | 0.851    | -0.038  | 0.520    |
| Thigh, cm                              | 0.185 | 0.011    | 0.393   | 0.030    | -0.192  | 0.029    |
| Fat Mass Index, kg/m <sup>2</sup>      | 0.349 | 0.046    | -0.289  | 0.510    | 0.084   | 0.689    |
| Lean Mass Index, kg/m <sup>2</sup>     | 0.264 | 0.230    | 1.737   | 0.001    | -0.376  | 0.156    |
| Visceral mass index, kg/m <sup>2</sup> | 2.543 | 0.147    | -4.564  | 0.296    | -0.320  | 0.880    |
| Android fat mass, kg                   | 0.001 | 0.037    | 0.000   | 0.647    | 0.000   | 0.805    |
| Gynoid fat mass, kg                    | 0.001 | 0.053    | 0.000   | 0.779    | 1.049   | 0.980    |
| Gynoid lean mass, kg                   | 0.000 | 0.166    | 0.002   | 0.005    | -0.001  | 0.011    |
| Legs fat mass, kg                      | 0.000 | 0.093    | 0.000   | 0.382    | 5.894   | 0.796    |
| Legs lean mass, kg                     | 0.000 | 0.371    | 0.001   | 0.049    | 0.000   | 0.107    |
| AF/GF                                  | 3.835 | 0.072    | 3.635   | 0.492    | -2.732  | 0.289    |
| GF/TF                                  | 4.173 | 0.322    | -18.772 | 0.069    | -0.786  | 0.878    |
| AF/TF                                  | 7.320 | 0.153    | -20.935 | 0.098    | -3.296  | 0.594    |
| LF/TF                                  | 1.943 | 0.395    | -12.841 | 0.021    | 0.144   | 0.958    |
| GL/TL                                  | 4.347 | 0.529    | 45.772  | 0.006    | -18.694 | 0.025    |
| LL/TL                                  | 1.219 | 0.676    | 16.716  | 0.018    | -6.447  | 0.067    |

AF/GF, android fat/gynoid fat; GF/TF, gynoid fat/total fat; AF/TF, android fat/total fat; LF/TF legs fat/total fat; GL/TL gynoid lean/total lean; AL/TL android lean/total lean; LL/TL legs lean/total lean

Model 3: adjusted for age and WHR.

Data from the analysis of the population after exclusion of patients with a history of cardiovascular disease (atrial hypertension, atrial fibrillation, myocardial infarction, coronary heart disease, peripheral artery disease, stroke), heart failure, diabetes mellitus, chronic obstructive pulmonary disease, asthma, cancer, chronic kidney disease with glomerular filtration rate <60ml/min, and any mental disorder).

Table S9. Characteristics of the sub population without significant diseases.

| Variable                                 | Total population<br><i>n</i> = 411 | Woman<br><i>n</i> = 227 | Man<br><i>n</i> = 184 | <i>p</i> |
|------------------------------------------|------------------------------------|-------------------------|-----------------------|----------|
| Age, years                               | 41.50±13.83                        | 42.12±14.08             | 40.75±13.52           | 0.265    |
| SWLS                                     | 23.26±5.34                         | 23.12±5.29              | 23.31±5.42            | 0.79     |
| EQ-VAS                                   | 80.46±13.11                        | 78.46±13.53             | 82.95±12.14           | <0.001   |
| BDI                                      | 5.94±5.90                          | 6.67±6.20               | 5.04±5.39             | <0.006   |
| Height, cm                               | 171.86±9.51                        | 165.82±6.53             | 179.30±7.02           | <0.001   |
| Weight, kg                               | 71.13±12.86                        | 63.62±8.66              | 80.40±11.01           | <0.001   |
| Waist, cm                                | 80.47±10.31                        | 74.89±8.05              | 87.47±8.39            | <0.001   |
| Hip, cm                                  | 95.29±6.91                         | 95.15±7.41              | 95.46±6.23            | 0.522    |
| Thigh, cm                                | 56.41±4.78                         | 56.02±4.75              | 56.90±4.80            | 0.040    |
| BMI, kg/m <sup>2</sup>                   | 23.97±3.11                         | 23.16±3.12              | 24.97±2.79            | <0.001   |
| BMI <25 kg/m <sup>2</sup>                | 243(59.1)                          | 159 (70)                | 84 (45)               | <0.001   |
| BMI 25-29.99 kg/m <sup>2</sup>           | 168 (40.9)                         | 68 (30)                 | 100 (54.3)            | <0.001   |
| WHR                                      | 0.84±0.09                          | 0.79±0.06               | 0.92±0.07             | <0.001   |
| WHR, ≥0.85 women,<br>≥0.9 men            | 147 (35.8)                         | 35 (15.4)               | 112 (60.9)            | <0.001   |
| Lean Mass Index,<br>(kg/m <sup>2</sup> ) | 16.06±2.08                         | 14.63±1.20              | 17.79±1.54            | <0.001   |
| Fat Mass Index, (kg/m <sup>2</sup> )     | 7.18±2.30                          | 7.82±2.29               | 6.40±2.05             | <0.001   |
| Android fat mass, kg                     | 1.73±0.84                          | 1.55±0.73               | 1.96±0.91             | <0.001   |
| Gynoid fat mass, kg                      | 3.47±1.05                          | 3.88±1.00               | 2.97±0.89             | <0.001   |
| Gynoid lean mass, kg                     | 7.16±1.56                          | 6.00±0.65               | 8.56±1.12             | <0.001   |
| Legs fat mass, kg                        | 6.69±2.14                          | 7.70±1.97               | 5.45±1.64             | <0.001   |
| Legs lean mass, kg                       | 16.46±3.76                         | 13.80±1.82              | 19.69±2.86            | <0.001   |
| AF/GF                                    | 0.50±0.21                          | 0.38±0.14               | 0.64±0.20             | <0.001   |
| GF/TF                                    | 0.15±0.07                          | 0.16±0.07               | 0.14±0.07             | <0.001   |
| AF/TF                                    | 0.08±0.05                          | 0.06±0.04               | 0.09±0.06             | <0.001   |
| LF/TF                                    | 0.29±0.14                          | 0.32±0.14               | 0.26±0.14             | <0.001   |
| GL/TL                                    | 0.15±0.05                          | 0.12±0.03               | 0.18±0.05             | <0.001   |
| LL/TL                                    | 0.35±0.12                          | 0.29±0.08               | 0.42±0.12             | <0.001   |

The data is shown as n (%), mean ± SD. SD, standard deviation; SWLS, Satisfaction With Life Scale; EQ-VAS, Euro Quality of Life Visual Analogue Scale; BDI, Beck Depression Inventory; BMI, body mass index; kg, kilogram; m<sup>2</sup>, square meter; WHR, waist-hip ratio; AF/GF, android fat/gynoid fat; GF/TF, gynoid fat/total fat; AF/TF, android fat/total fat; LF/TF legs fat/total fat; GL/TL, gynoid lean/total lean; LL/TL, legs lean/total lean.

Table S10. Univariate linear regression analysis between body composition and subjective well-being scores in non-obese women without significant diseases.

| Variable                               | SWLS    |          | EQ-VAS  |          | BDI     |          |
|----------------------------------------|---------|----------|---------|----------|---------|----------|
|                                        | B       | <i>p</i> | B       | <i>p</i> | B       | <i>p</i> |
| Age, years                             | -0.042  | 0.114    | -0.217  | 0.001    | 0.025   | 0.402    |
| Height, cm                             | 0.072   | 0.190    | 0.376   | 0.007    | -0.095  | 0.142    |
| Weight, kg                             | -0.015  | 0.718    | -0.129  | 0.221    | -0.048  | 0.334    |
| BMI, kg/m <sup>2</sup>                 | -0.152  | 0.199    | -0.864  | 0.003    | 0.001   | 0.994    |
| WHR                                    | -20.674 | <0.001   | -33.583 | 0.016    | 13.017  | 0.040    |
| Waist, cm                              | -0.113  | 0.014    | -0.352  | 0.002    | 0.051   | 0.343    |
| Hip, cm                                | 0.022   | 0.659    | -0.194  | 0.116    | -0.052  | 0.372    |
| Thigh, cm                              | 0.100   | 0.200    | 0.058   | 0.762    | -0.127  | 0.162    |
| Fat Mass Index, kg/m <sup>2</sup>      | -0.261  | 0.107    | -1.102  | 0.006    | 0.022   | 0.907    |
| Lean Mass Index, kg/m <sup>2</sup>     | 0.080   | 0.795    | -1.893  | 0.014    | -0.103  | 0.778    |
| Visceral mass index, kg/m <sup>2</sup> | -8.328  | 0.002    | -25.551 | <0.001   | 3.150   | 0.297    |
| Android fat mass, kg                   | -0.001  | 0.049    | -0.004  | 0.005    | 0.001   | 0.732    |
| Gynoid fat mass, kg                    | 5.851   | 0.877    | -0.001  | 0.303    | 0.000   | 0.403    |
| Gynoid lean mass, kg                   | 0.001   | 0.035    | 0.002   | 0.277    | -0.001  | 0.025    |
| Legs fat mass, kg                      | 0.000   | 0.430    | 1.501   | 0.975    | 0.000   | 0.157    |
| Legs lean mass, kg                     | 0.000   | 0.170    | 0.000   | 0.505    | 0.000   | 0.051    |
| AF/GF                                  | -9.262  | 0.001    | -22.566 | 0.001    | 4.024   | 0.216    |
| GF/TF                                  | -9.193  | 0.073    | -7.544  | 0.559    | 7.244   | 0.233    |
| AF/TF                                  | -27.276 | 0.004    | -52.683 | 0.031    | 21.299  | 0.060    |
| LF/TF                                  | -3.941  | 0.125    | 0.075   | 0.991    | 2.891   | 0.343    |
| GL/TL                                  | 0.472   | 0.967    | 11.676  | 0.681    | -20.785 | 0.116    |
| LL/TL                                  | -0.673  | 0.885    | 4.857   | 0.676    | -8.454  | 0.122    |

AF/GF, android fat/gynoid fat; GF/TF, gynoid fat/total fat; AF/TF, android fat/total fat; LF/TF legs fat/total fat; GL/TL gynoid lean/total lean; LL/TL legs lean/total lean.

Table S11 Univariate linear regression analysis between body composition and subjective well-being scores in non-obese men without significant diseases

| Variable                               | SWLS   |          | EQ-VAS  |          | BDI                      |          |
|----------------------------------------|--------|----------|---------|----------|--------------------------|----------|
|                                        | B      | <i>p</i> | B       | <i>p</i> | B                        | <i>p</i> |
| Age, years                             | 0.016  | 0.602    | -0.245  | <0.001   | 0.018                    | 0.558    |
| Height, cm                             | 0.044  | 0.447    | 0.233   | 0.073    | -0.117                   | 0.046    |
| Weight, kg                             | 0.071  | 0.056    | 0.189   | 0.025    | -0.083                   | 0.026    |
| BMI, kg/m <sup>2</sup>                 | 0.268  | 0.073    | 0.474   | 0.154    | -0.103                   | 0.183    |
| WHR                                    | -7.785 | 0.228    | -30.170 | 0.032    | 2.380                    | 0.713    |
| Waist, cm                              | 0.047  | 0.346    | -0.092  | 0.409    | -0.053                   | 0.290    |
| Hip, cm                                | 0.176  | 0.008    | 0.163   | 0.265    | -0.130                   | 0.053    |
| Thigh, cm                              | 0.212  | 0.016    | 0.788   | <0.001   | -0.259                   | 0.003    |
| Fat Mass Index, kg/m <sup>2</sup>      | 0.190  | 0.344    | -0.204  | 0.648    | -0.046                   | 0.819    |
| Lean Mass Index, kg/m <sup>2</sup>     | 0.537  | 0.052    | 1.881   | 0.002    | -0.605                   | 0.028    |
| Visceral mass index, kg/m <sup>2</sup> | 1.112  | 0.544    | -7.466  | 0.062    | 0.041                    | 0.982    |
| Android fat mass, kg                   | 0.000  | 0.267    | 0.000   | 0.724    | 0.000                    | 0.619    |
| Gynoid fat mass, kg                    | 0.001  | 0.192    | 0.001   | 0.521    | 0.000                    | 0.501    |
| Gynoid lean mass, kg                   | 0.001  | 0.020    | 0.003   | <0.001   | -0.001                   | 0.001    |
| Legs fat mass, kg                      | 0.000  | 0.453    | 6.990   | 0.901    | 0.000                    | 0.536    |
| Legs lean mass, kg                     | 0.000  | 0.124    | 0.001   | 0.001    | 0.000<br><b>β</b> -0.188 | 0.015    |
| AF/GF                                  | 1.982  | 0.345    | -3.330  | 0.464    | -0.763                   | 0.719    |
| GF/TF                                  | 6.158  | 0.268    | 0.536   | 0.965    | -1.677                   | 0.763    |
| AF/TF                                  | 10.561 | 0.127    | -0.131  | 0.993    | -3.301                   | 0.633    |
| LF/TF                                  | 2.162  | 0.479    | -2.263  | 0.735    | -0.644                   | 0.833    |
| GL/TL                                  | 12.109 | 0.158    | 41.732  | 0.023    | -17.441                  | 0.041    |
| LL/TL                                  | 4.022  | 0.267    | 17.054  | 0.028    | -6.393                   | 0.077    |

AF/GF, android fat/gynoid fat; GF/TF, gynoid fat/total fat; AF/TF, android fat/total fat; LF/TF legs fat/total fat; GL/TL gynoid lean/total lean; LL/TL legs lean/total lean.

Table S12. Multivariable linear regression analysis adjusted by age (Model 1) between body composition and subjective well-being scores in non-obese women without significant diseases.

| Variable                               | SWLS    |          | EQ-VAS  |          | BDI     |          |
|----------------------------------------|---------|----------|---------|----------|---------|----------|
|                                        | B       | <i>p</i> | B       | <i>p</i> | B       | <i>p</i> |
| Height, cm                             | 0.044   | 0.472    | 0.223   | 0.140    | -0.088  | 0.221    |
| Weight, kg                             | -0.004  | 0.926    | -0.056  | 0.595    | -0.058  | 0.256    |
| BMI, kg/m <sup>2</sup>                 | -0.087  | 0.505    | -0.525  | 0.106    | -0.064  | 0.680    |
| WHR                                    | -20.091 | 0.001    | -18.706 | 0.207    | 13.242  | 0.062    |
| Waist, cm                              | -0.101  | 0.051    | -0.216  | 0.096    | 0.038   | 0.536    |
| Hip, cm                                | 0.045   | 0.386    | -0.085  | 0.502    | -0.070  | 0.249    |
| Thigh, cm                              | 0.101   | 0.194    | 0.091   | 0.631    | -0.128  | 0.157    |
| Fat Mass Index, kg/m <sup>2</sup>      | -0.201  | 0.255    | -0.637  | 0.150    | -0.050  | 0.812    |
| Lean Mass Index, kg/m <sup>2</sup>     | 0.272   | 0.409    | -1.097  | 0.178    | -0.243  | 0.537    |
| Visceral mass index, kg/m <sup>2</sup> | -8.833  | 0.005    | -20.086 | 0.008    | 2.759   | 0.445    |
| Android fat mass, kg                   | -0.001  | 0.120    | -0.002  | 0.104    | 3.199   | 0.961    |
| Gynoid fat mass, kg                    | 0.000   | 0.763    | -0.001  | 0.553    | 0.000   | 0.353    |
| Gynoid lean mass, kg                   | 0.001   | 0.052    | 0.001   | 0.442    | -0.001  | 0.031    |
| Legs fat mass, kg                      | 0.000   | 0.370    | 0.000   | 0.653    | 0.000   | 0.135    |
| Legs lean mass, kg                     | 0.000   | 0.227    | 0.000   | 0.707    | 0.000   | 0.062    |
| AF/GF                                  | -0.231  | 0.003    | -15.388 | 0.042    | 3.575   | 0.329    |
| GF/TF                                  | -9.168  | 0.073    | -8.356  | 0.508    | 7.294   | 0.231    |
| AF/TF                                  | -25.418 | 0.010    | -33.723 | 0.174    | 20.314  | 0.084    |
| LF/TF                                  | -3.955  | 0.123    | -0.371  | 0.953    | 2.925   | 0.337    |
| GL/TL                                  | 2.231   | 0.843    | 19.994  | 0.472    | -22.032 | 0.097    |
| LL/TL                                  | -0.075  | 0.987    | 7.770   | 0.495    | -8.869  | 0.106    |

AF/GF, android fat/gynoid fat; GF/TF, gynoid fat/total fat; AF/TF, android fat/total fat; LF/TF legs fat/total fat; GL/TL gynoid lean/total lean; LL/TL legs lean/total lean  
Model 1: adjusted for age.

Table S13. Multivariable linear regression analysis adjusted by age (Model 1) between body composition and subjective well-being scores in non-obese men without significant diseases.

| Variable                               | SWLS    |          | EQ-5D   |          | BDI               |          |
|----------------------------------------|---------|----------|---------|----------|-------------------|----------|
|                                        | B       | <i>p</i> | B       | <i>p</i> | B                 | <i>p</i> |
| Height, cm                             | 0.062   | 0.319    | 0.072   | 0.593    | -0.120            | 0.057    |
| Weight, kg                             | 0.073   | 0.051    | 0.163   | 0.046    | -0.082            | 0.029    |
| BMI, kg/m <sup>2</sup>                 | 0.262   | 0.084    | 0.675   | 0.037    | -0.220            | 0.150    |
| WHR                                    | -10.821 | 0.123    | -11.364 | 0.447    | 1.220             | 0.863    |
| Waist, cm                              | 0.043   | 0.420    | 0.047   | 0.677    | -0.069            | 0.197    |
| Hip, cm                                | 0.175   | 0.009    | 0.189   | 0.180    | -0.132            | 0.051    |
| Thigh, cm                              | 0.236   | 0.009    | 0.650   | 0.001    | -0.263            | 0.003    |
| Fat Mass Index, kg/m <sup>2</sup>      | 0.177   | 0.388    | 0.149   | 0.735    | -0.071            | 0.728    |
| Lean Mass Index, kg/m <sup>2</sup>     | 0.534   | 0.054    | 1.850   | 0.001    | -0.608            | 0.028    |
| Visceral mass index, kg/m <sup>2</sup> | 0.854   | 0.680    | -0.341  | 0.939    | -0.584            | 0.778    |
| Android fat mass, kg                   | 0.000   | 0.309    | 0.001   | 0.571    | 0.000             | 0.523    |
| Gynoid fat mass, kg                    | 0.001   | 0.183    | 0.000   | 0.652    | 0.000             | 0.521    |
| Gynoid lean mass, kg                   | 0.001   | 0.012    | 0.002   | 0.005    | -0.001            | 0.002    |
| Legs fat mass, kg                      | 0.000   | 0.433    | -6.374  | 0.906    | 0.000             | 0.560    |
| Legs lean mass, kg                     | 0.000   | 0.084    | 0.001   | 0.015    | 0.000<br>β -0.190 | 0.018    |
| AF/GF                                  | 1.848   | 0.426    | 4.944   | 0.312    | -1.572            | 0.502    |
| GF/TF                                  | 6.589   | 0.240    | -5.418  | 0.648    | -1.296            | 0.817    |
| AF/TF                                  | 10.383  | 0.135    | 3.304   | 0.825    | -3.585            | 0.606    |
| LF/TF                                  | 2.387   | 0.439    | -5.683  | 0.383    | -0.426            | 0.890    |
| GL/TL                                  | 12.430  | 0.149    | 35.682  | 0.045    | -17.166           | 0.046    |
| LL/TL                                  | 4.202   | 0.249    | 14.099  | 0.063    | -6.249            | 0.085    |

AF/GF, android fat/gynoid fat; GF/TF, gynoid fat/total fat; AF/TF, android fat/total fat; LF/TF legs fat/total fat; GL/TL gynoid lean/total lean; LL/TL legs lean/total lean  
Model 1: adjusted for age.
